# Supplementary material for: Knowledge, Attitudes, and Stigma: The Perceptions of Tuberculosis in Equatorial Guinea
Source: MDPI journal article supplement (doi:10.3390/ijerph19148227), 2022-07-06
Supplement: s1 [file s1]

Table S1. Tuberculosis symptoms and risk perception knowledge

|                                                                                 | Total (n=770) |      | Rural (n=210) |      | Urban (n=560) |      | p-value* |
|---------------------------------------------------------------------------------|---------------|------|---------------|------|---------------|------|----------|
|                                                                                 | n             | %    | n             | %    | n             | %    |          |
| <b>Do you think that there is TB in your community?</b>                         |               |      |               |      |               |      | <0.001   |
| No                                                                              | 301           | 39.1 | 71            | 33.8 | 230           | 41.1 |          |
| Yes                                                                             | 250           | 32.5 | 100           | 47.6 | 150           | 26.8 |          |
| Do not know                                                                     | 219           | 28.4 | 39            | 18.6 | 180           | 32.1 |          |
| <b>Do you think TB is a serious disease?</b>                                    |               |      |               |      |               |      | 0.275    |
| Yes                                                                             | 718           | 93.2 | 198           | 94.3 | 520           | 92.9 |          |
| No                                                                              | 32            | 4.2  | 6             | 2.9  | 26            | 4.6  |          |
| Do not know                                                                     | 19            | 2.5  | 5             | 2.4  | 14            | 2.5  |          |
| <b>What do you think causes TB?</b>                                             |               |      |               |      |               |      | 0.620    |
| Do not know                                                                     | 484           | 64.6 | 139           | 66.5 | 345           | 63.9 |          |
| Alcohol, and tobacco and drugs                                                  | 77            | 10.3 | 22            | 10.5 | 55            | 10.2 |          |
| Tobacco                                                                         | 59            | 7.9  | 13            | 6.2  | 46            | 8.5  |          |
| Bacteria or germs                                                               | 57            | 7.6  | 12            | 5.7  | 45            | 8.3  |          |
| Alcohol                                                                         | 35            | 4.7  | 10            | 4.8  | 25            | 4.6  |          |
| Others                                                                          | 37            | 4.9  | 13            | 6.3  | 24            | 4.4  |          |
| <b>How is TB transmitted?</b>                                                   |               |      |               |      |               |      |          |
| Sharing dishes/glasses                                                          | 489           | 63.5 | 142           | 67.6 | 347           | 62.0 | 0.147    |
| Through the air when a person with TB coughs or sneezes                         | 389           | 50.5 | 99            | 47.1 | 290           | 51.8 | 0.251    |
| Do not know                                                                     | 105           | 13.6 | 29            | 13.9 | 76            | 13.6 | 0.179    |
| Through handshakes                                                              | 56            | 7.3  | 8             | 3.8  | 48            | 8.6  | 0.023    |
| Sexual relationship                                                             | 30            | 3.9  | 9             | 4.3  | 21            | 3.8  | 0.732    |
| By touching items in public places (doorknobs, handles in transportation, etc.) | 26            | 3.4  | 6             | 2.9  | 20            | 3.6  | 0.625    |
| <b>What are the signs and symptoms of TB?</b>                                   |               |      |               |      |               |      |          |
| Coughing                                                                        | 504           | 65.5 | 146           | 69.5 | 358           | 63.9 | 0.146    |
| Weight loss                                                                     | 256           | 33.2 | 75            | 35.7 | 181           | 32.3 | 0.373    |
| Do not know                                                                     | 162           | 21.0 | 40            | 19.0 | 122           | 21.8 | 0.406    |
| Chest pain                                                                      | 121           | 15.7 | 28            | 13.3 | 93            | 16.6 | 0.266    |
| Coughing up blood                                                               | 116           | 15.1 | 40            | 19.0 | 76            | 13.6 | 0.058    |
| Fever                                                                           | 102           | 13.2 | 26            | 12.4 | 76            | 13.6 | 0.664    |
| Severe headache                                                                 | 25            | 3.2  | 6             | 2.9  | 19            | 3.4  | 0.709    |
| Rash                                                                            | 6             | 0.8  | 1             | 0.5  | 5             | 0.9  | 0.558    |

\* p-value of the Chi-square test of differences.

Table S2. Tuberculosis transmission mechanisms and treatment knowledge and belief variables

|                                                                                   | Total (n=770) |      | Rural (n=210) |      | Urban (n=560) |      | p-value* |
|-----------------------------------------------------------------------------------|---------------|------|---------------|------|---------------|------|----------|
|                                                                                   | n             | %    | n             | %    | n             | %    |          |
| <b>In your opinion, who could be infected with TB?</b>                            |               |      |               |      |               |      |          |
| Everybody                                                                         | 339           | 44.0 | 93            | 44.3 | 246           | 43.9 | 0.929    |
| Only alcoholics                                                                   | 127           | 16.5 | 35            | 16.7 | 92            | 16.4 | 0.937    |
| Do not know                                                                       | 92            | 11.9 | 29            | 13.8 | 63            | 11.3 | 0.329    |
| Only drug users                                                                   | 85            | 11.0 | 21            | 10.0 | 64            | 11.4 | 0.573    |
| Children                                                                          | 49            | 6.4  | 11            | 5.2  | 38            | 6.8  | 0.433    |
| Smokers                                                                           | 37            | 4.8  | 16            | 7.6  | 21            | 3.8  | 0.025    |
| Anyone who shares, is close to or lives with a TB patient (partner, family, etc.) | 30            | 3.9  | 13            | 6.2  | 17            | 3.0  | 0.044    |
| <b>Do you think tuberculosis can be prevented?</b>                                |               |      |               |      |               |      | 0.314    |
| Yes                                                                               | 604           | 78.4 | 157           | 74.8 | 447           | 79.8 |          |
| Do not know                                                                       | 104           | 13.5 | 33            | 15.7 | 71            | 12.7 |          |
| No                                                                                | 62            | 8.1  | 20            | 9.5  | 42            | 7.5  |          |
| <b>How?</b>                                                                       |               |      |               |      |               |      |          |
| Avoid sharing dishes                                                              | 402           | 52.2 | 120           | 57.1 | 282           | 50.4 | 0.093    |
| Covering mouth and nose when coughing or sneezing                                 | 234           | 30.4 | 56            | 26.7 | 178           | 31.8 | 0.169    |
| Avoid shaking hands                                                               | 71            | 9.2  | 13            | 6.2  | 58            | 10.4 | 0.075    |
| Isolating the infected person                                                     | 61            | 7.9  | 11            | 5.2  | 50            | 8.9  | 0.091    |
| Hygiene                                                                           | 54            | 7.0  | 13            | 6.2  | 41            | 7.3  | 0.584    |
| <b>Can TB be cured?</b>                                                           |               |      |               |      |               |      | 0.227    |
| Yes                                                                               | 754           | 97.9 | 205           | 97.6 | 549           | 98.0 |          |
| No                                                                                | 8             | 1.0  | 4             | 1.9  | 4             | 0.7  |          |
| Do not know                                                                       | 8             | 1.0  | 1             | 0.5  | 7             | 1.3  |          |
| <b>How?</b>                                                                       |               |      |               |      |               |      |          |
| With specific drugs                                                               | 706           | 91.7 | 188           | 89.5 | 518           | 92.5 | 0.183    |
| Praying                                                                           | 11            | 1.4  | 4             | 1.9  | 7             | 1.3  | 0.495    |
| With herbal remedies                                                              | 4             | 0.5  | 0             | 0.0  | 4             | 0.7  | 0.219    |
| <b>Where do you think you should go to treat TB?</b>                              |               |      |               |      |               |      | 0.222    |
| Hospital                                                                          | 756           | 98.2 | 209           | 99.5 | 547           | 97.7 |          |
| Health Centre                                                                     | 11            | 1.4  | 1             | 0.5  | 10            | 1.8  |          |
| Do not know                                                                       | 3             | 0.4  | 0             | 0.0  | 3             | 0.5  |          |
| <b>How much do you think it costs to diagnose and treat tuberculosis?</b>         |               |      |               |      |               |      | 0.040    |
| It is free of charge                                                              | 571           | 74.2 | 167           | 79.5 | 404           | 72.1 |          |
| Do not know                                                                       | 124           | 16.1 | 25            | 11.9 | 99            | 17.7 |          |
| It is reasonably priced                                                           | 38            | 4.9  | 8             | 3.8  | 30            | 5.4  |          |
| It is moderately expensive                                                        | 16            | 2.1  | 2             | 1.0  | 14            | 2.5  |          |
| It is very expensive                                                              | 17            | 2.2  | 8             | 3.8  | 9             | 1.6  |          |
| Other                                                                             | 4             | 0.5  | 0             | 0.0  | 4             | 0.7  |          |

\* p-value of the Chi-square test of differences.

Table S3. Attitudes towards tuberculosis disease.

| Variable                                                | Total (n=486)<br>n (%) | Rural (n=144)<br>n (%) | Urban (n=342)<br>n (%) | p-value* |
|---------------------------------------------------------|------------------------|------------------------|------------------------|----------|
| <b>Do you think you could get infected with TB?</b>     |                        |                        |                        | 0.655    |
| Yes                                                     | 348 (71.6)             | 104 (72.2)             | 244 (71.3)             |          |
| No                                                      | 94 (19.3)              | 25 (17.4)              | 69 (20.2)              |          |
| Do not know                                             | 44 (9.1)               | 15 (10.4)              | 29 (8.5)               |          |
| <b>How would you feel if you are diagnosed with TB?</b> |                        |                        |                        |          |
| Fear                                                    | 167 (34.4)             | 52 (36.1)              | 115 (33.6)             | 0.598    |
| Sadness or hopelessness                                 | 157 (32.3)             | 55 (38.2)              | 102 (29.8)             | 0.072    |
| Rage                                                    | 133 (27.4)             | 39 (27.1)              | 94 (27.5)              | 0.928    |
| Surprise                                                | 64 (13.2)              | 20 (13.9)              | 44 (12.9)              | 0.761    |
| I would cope with it                                    | 52 (10.7)              | 13 (9.0)               | 39 (11.4)              | 0.439    |
| Shame                                                   | 21 (4.3)               | 7 (4.9)                | 14 (4.1)               | 0.704    |
| Do not know                                             | 20 (4.1)               | 6 (4.2)                | 14 (4.1)               | 0.970    |
| <b>Who would you talk about your TB diagnoses?</b>      |                        |                        |                        |          |
| Doctor or other medical worker                          | 225 (46.3)             | 69 (47.9)              | 156 (45.6)             | 0.642    |
| Other family member                                     | 210 (43.2)             | 80 (55.6)              | 130 (38.0)             | <0.001   |
| Partner                                                 | 203 (41.8)             | 56 (38.9)              | 147 (43.0)             | 0.403    |
| Parent                                                  | 93 (19.1)              | 20 (13.9)              | 73 (21.3)              | 0.056    |
| Child(ren)                                              | 43 (8.8)               | 12 (8.3)               | 31 (9.1)               | 0.796    |
| Close friend                                            | 40 (8.2)               | 10 (6.9)               | 30 (8.8)               | 0.503    |
| No one                                                  | 4 (0.8)                | 2 (1.4)                | 2 (0.6)                | 0.370    |
| Priest                                                  | 3 (0.6)                | 1 (0.7)                | 2 (0.6)                | 0.888    |
| Traditional healer                                      | 1 (0.2)                | 0 (0.0)                | 1 (0.3)                | 0.516    |
| <b>Place to go if you would have TB symptoms</b>        |                        |                        |                        |          |
| Hospital                                                | 452 (93.0)             | 136 (94.4)             | 316 (92.4)             | 0.419    |
| Health care centre                                      | 36 (7.4)               | 9 (6.3)                | 27 (7.9)               | 0.527    |
| Clinic/Private health care centre                       | 6 (1.2)                | 0 (0.0)                | 6 (1.8)                | 0.110    |
| Pharmacy                                                | 3 (0.6)                | 0 (0.0)                | 3 (0.9)                | 0.260    |
| Church                                                  | 3 (0.6)                | 1 (0.7)                | 2 (0.6)                | 0.888    |
| Traditional healer                                      | 2 (0.4)                | 0 (0.0)                | 2 (0.6)                | 0.358    |
| <b>If you do not improve, where would you go then?</b>  |                        |                        |                        | 0.016    |
| Hospital                                                | 341 (70.2)             | 114 (79.2)             | 227 (66.4)             |          |
| Traditional healer                                      | 44 (9.1)               | 12 (8.3)               | 32 (9.4)               |          |
| Church                                                  | 18 (3.7)               | 1 (0.7)                | 17 (5.0)               |          |
| Health care centre                                      | 9 (1.9)                | 1 (0.7)                | 8 (2.3)                |          |
| Other                                                   | 36 (7.4)               | 4 (2.8)                | 32 (9.4)               |          |
| Do not know                                             | 27 (5.6)               | 7 (4.9)                | 20 (5.8)               |          |
| Clinic/Private health care centre                       | 8 (1.6)                | 3 (2.1)                | 5 (1.5)                |          |
| Pharmacy                                                | 3 (0.6)                | 2 (1.4)                | 1 (0.3)                |          |

\* p-value of the Chi-square test of differences.

Table S4. Stigma towards patients with tuberculosis

|                                                                           | Total<br>(n=770) |      | Rural<br>(n=210) |      | Urban<br>(n=560) |      | p-value* |
|---------------------------------------------------------------------------|------------------|------|------------------|------|------------------|------|----------|
|                                                                           | n                | %    | n                | %    | n                | %    |          |
| <b>Which statement is closest to your feeling towards people with TB?</b> |                  |      |                  |      |                  |      | 0.542    |
| I feel compassion and desire to help.                                     | 572              | 74.3 | 149              | 71.0 | 423              | 75.5 |          |
| I feel compassion but I tend to stay away from these people               | 136              | 17.7 | 44               | 21.0 | 92               | 16.4 |          |
| I fear them because they can infect me                                    | 27               | 3.5  | 7                | 3.3  | 20               | 3.6  |          |
| I have no particular feeling                                              | 10               | 1.3  | 4                | 1.9  | 6                | 1.1  |          |
| It is their problem and I cannot get TB                                   | 4                | 0.5  | 1                | 0.5  | 3                | 0.5  |          |
| Other                                                                     | 10               | 1.3  | 1                | 0.5  | 9                | 1.6  |          |
| Do not know                                                               | 11               | 1.4  | 4                | 1.9  | 7                | 1.3  |          |
| <b>In your community, how is a person who has TB usually treated?</b>     |                  |      |                  |      |                  |      | 0.183    |
| The community mostly supports and helps him or her                        | 371              | 48.2 | 106              | 50.5 | 265              | 47.3 |          |
| Most people reject him or her                                             | 153              | 19.9 | 44               | 21.0 | 109              | 19.5 |          |
| Most people are friendly, but they generally try to avoid him or her      | 97               | 12.6 | 29               | 13.8 | 68               | 12.1 |          |
| They advise and help him or her                                           | 24               | 3.1  | 8                | 3.8  | 16               | 2.9  |          |
| Do not know                                                               | 125              | 16.2 | 23               | 11.0 | 102              | 18.2 |          |

\* p-value of the Chi-square test of differences.
